# Supplementary material
Source: PubMed Central journal article supplement (PMC7340563)
Supplement: NIHMS1586758-supplement-SUPINFO.pdf [file NIHMS1586758-supplement-SUPINFO.pdf]

# Supporting Information

## 1 Appendix S1: Excluding adults and calculating relative species- 2 level $R_{0,s,p}$

3 Our sampling protocol did not systematically sample adult amphibians, even if they were present at a site.  
4 If adult amphibians were important, but unobserved contributors to Bd dynamics within a season, then our  
5 estimates of absolute, species-level  $R_{0,s,p}$  values could be biased. Analysis of adults that were haphazardly  
6 sampled during surveys suggested that adults tended to have higher mean Bd loads than larvae and that  
7 differences in prevalence between adults and larvae varied by species. Given that the density of larval  
8 amphibians is typically higher than adults after breeding given the large number of eggs produced by gravid  
9 females (from tens to thousands of eggs, Stebbins & McGinnis 2012), it is hard to precisely say whether adults  
10 are significant contributors to within-season Bd dynamics and we expect that the contribution of adults could  
11 vary by patch and species. Because of this ambiguity, we performed both a relative and absolute analysis of  
12 species-level  $R_{0,s,p}$ , recognizing that the unknown contribution of adults on within-season Bd dynamics could  
13 potentially limit our inference on absolute  $R_{0,s,p}$  values. Similarly, our study design focused on sampling late-  
14 stage larvae and metamorphosing amphibians, but did not sample early-stage larvae. This could also limit  
15 our inference on absolute  $R_{0,s,p}$  values if early-stage larvae show significantly different infection patterns than  
16 late-stage larvae. While we suspect this is unlikely for the five native amphibian species that metamorphose  
17 within the same season, the long tadpole stage of *R. catesbeiana* could lead to differences in infection patterns  
18 between early- and late-stage tadpoles. However, as we describe below, our inference on *relative*  $R_{0,s,p}$  values  
19 are robust to the exclusion of particular life stages or species.

## 20 Calculating relative $R_{0,s,p}$

21 Consider the following equation for  $R_{0,s,p}$  based on equation 1 in the main text

$$R_{0,s,p} = \frac{\beta_{sp} \lambda_s N_{sp}^*}{b_{sp} \gamma_p} = \frac{1 + \frac{\phi_s}{b_{sp}} \sum_{j \in \text{Patches}} (c_{jp} - c_{pj} \frac{A_j}{A_p} \frac{\Pi_{sj}^*}{\Pi_{sp}^*} \frac{N_{sj}^*}{N_{sp}^*})}{(1 - \Pi_{sp}^*) (\sum_{i \in \text{Species}} \frac{\lambda_{ip}}{\lambda_{sp}} \frac{\Pi_{ip}^*}{\Pi_{sp}^*} \frac{N_{ip}^*}{N_{sp}^*})} \quad (\text{S1})$$

22 A useful property of this equation is that ratios of  $R_{0,s,p}$  between two species within a patch only depend  
23 on the two species being compared. To illustrate this, consider two species, 1 and 2, in patch  $p$ . Let

24  $W_{sp} = \frac{\phi_s}{b_{sp}} \sum_{j \in \text{Patches}} (c_{jp} - c_{pj} \frac{A_j}{A_p} \frac{\Pi_{sj}^*}{\Pi_{sp}^*} \frac{N_{sj}^*}{N_{sp}^*})$  and  $F_{sp} = \lambda_{sp} \Pi_{sp}^* N_{sp}^*$ . We can write  $\frac{R_{0,1,p}}{R_{0,2,p}}$  as

$$\frac{R_{0,1,p}}{R_{0,2,p}} = \left( \frac{1 + W_{1p}}{1 + W_{2p}} \right) \left( \frac{1 - \Pi_{2p}^*}{1 - \Pi_{1p}^*} \right) \left( \frac{\frac{1}{F_{2p}} \sum_{i \in \text{Species}} F_{ip}}{\frac{1}{F_{1p}} \sum_{i \in \text{Species}} F_{ip}} \right) \quad (\text{S2})$$

25 which simplifies to

$$\frac{R_{0,1,p}}{R_{0,2,p}} = \left( \frac{1 + W_{1p}}{1 + W_{2p}} \right) \left( \frac{1 - \Pi_{2p}^*}{1 - \Pi_{1p}^*} \right) \left( \frac{F_{1p}}{F_{2p}} \right) \quad (\text{S3})$$

26 Equation S3 shows that the ratio of species-level  $R_{0,s,p}$  only depends on the parameters of the two species  
 27 being compared. This result is useful because if species or life stages other than 1 and 2, for example, were  
 28 not sampled in a community, their omission would not affect the calculation of relative  $R_{0,s,p}$  ratios.

## 29 **Appendix S2: The endemic equilibrium assumption**

30 In this study, infection was sampled only once per year for a given pond and thus could not conclusively  
 31 test whether or not particular patches were in approximate equilibrium within a season. However, Fenton  
 32 *et al.* (2015) showed that calculations of  $R_0$  using this approach are relatively robust to deviations from  
 33 the equilibrium assumption if prevalence and host density are fluctuating about a mean value through time.  
 34 Biologically, our sampling period was generally after the influx of adult amphibians for breeding and before  
 35 the efflux of metamorphs from the pond, such that we did not expect densities to vary drastically within the  
 36 sampling period. Moreover, pooling prevalence estimates across the sampled months showed no consistent  
 37 peaks in prevalence during the sampling season for the six species considered (Fig. S2), suggesting that an  
 38 approximate endemic equilibrium assumption is not strongly violated for this system.

## 39 **Appendix S3: Estimating parameters from data**

### 40 **Prevalence and Bd load**

41 We used the Bd survey data described in the main text to estimate two sets of parameters: prevalences  $\Pi_{sp}$   
 42 and shedding rate ratios  $\frac{\lambda_{ip}}{\lambda_{sp}}$ . Based on previous work in other amphibian Bd systems, we assumed that host  
 43 shedding rate was proportional to Bd load (DiRenzo *et al.* 2014) and estimated the shedding rate ratios for  
 44 species  $s$  and  $i$  in patch  $p$  as the ratio between estimated mean Bd loads for species  $s$  and  $i$  in patch  $p$ .

45 We used the methods developed in previous studies to account for false absences and measurement error  
 46 when estimating species-level mean prevalence and Bd load from the survey data (Miller *et al.* 2012; DiRenzo  
 47 *et al.* 2018). We accounted for false absences by modeling true prevalence in species  $s$  and patch  $p$  ( $\zeta_{s,p}$ ) as

$$\sum_{j=1}^{t_i} \mathbb{1}_{y_{ij}>0} \sim \text{Binomial}(z_i p_i^*, t_i) \quad (\text{S4})$$

$$\text{logit}(p_i^*) = \eta_1 + \eta_2 \log(x_i) \quad (\text{S5})$$

$$z_i \sim \text{Bernoulli}(\zeta_{sp}) \quad (\text{S6})$$

48 where  $z_i$  was the true infection state of host  $i$ ,  $\mathbb{1}_{y_{ij}>0}$  was a indicator variable that was one if the Bd load  
 49 for host  $i$  on swab  $j$  was greater than zero and zero otherwise,  $t_i$  was the number of swabs for host  $i$  (three  
 50 swabs per host in our data),  $\eta_2$  determined how logit detection probability  $p_i^*$  changed with true load  $x_i$ ,  
 51 and  $\eta_1$  was the intercept. Because detection probability  $p_i^*$  describes the probability of correctly detecting  
 52 Bd presence on a host,  $1 - p_i^*$  describes the probability of a false absence for host  $i$ .

53 We modeled true prevalence  $\zeta_{s,p}$  as

$$\begin{aligned} \text{logit}(\zeta_{s,p}) &= \kappa_0 + \omega_{\text{species}[s]} + \omega_{\text{patch}[p]} + \omega_{\text{patch} \times \text{species}[sp]} \\ \omega_{\text{species}[s]} &\sim N(0, 3) \\ \omega_{\text{patch}[p]} &\sim N(0, 3) \\ \omega_{\text{patch} \times \text{species}[sp]} &\sim N(0, 3) \end{aligned} \quad (\text{S7})$$

54 where  $\omega_{\cdot}$  were normally distributed random effects. We were unable to infer both the variance in the  
 55 prevalence random effects  $\omega_{\cdot}$  and the variance in the Bd load random effects  $\alpha_{\cdot}$  (see below). Therefore, we  
 56 fixed the variance of the prevalence random effects  $\omega_{\cdot}$  at a standard deviation of three to allow particular  
 57 random effects of prevalence to potentially take a large range of values. The parameter  $\kappa_0$  was the baseline  
 58 logit prevalence.

59 We modeled the true Bd load  $x_i$  on host  $i$  as

$$\log(x_i) \sim \text{Normal}(\tau_{sp}, \sigma_{\text{process}}) \quad (\text{S8})$$

60 where the true mean log load  $\tau_{sp}$  was a function of species  $s$  in patch  $p$  and  $\sigma_{\text{process}}$  was the standard deviation  
 61 of true Bd load. Specifically,

$$\begin{aligned}
\tau_{sp} &= \tau_0 + \alpha_{\text{species}[s]} + \alpha_{\text{patch}[p]} + \alpha_{\text{patch} \times \text{species}[sp]} \\
\alpha_{\text{species}[s]} &\sim N(0, \sigma_{\text{species}}) \\
\alpha_{\text{patch}[p]} &\sim N(0, \sigma_{\text{patch}}) \\
\alpha_{\text{patch} \times \text{species}[sp]} &\sim N(0, \sigma_{\text{species} \times \text{patch}}) \\
\sigma_{\text{species}}, \sigma_{\text{patch}}, \sigma_{\text{species} \times \text{patch}} &\sim \text{Half-Normal}(0, 3)
\end{aligned} \tag{S9}$$

62 where  $\alpha \cdot$  were normally distributed random effects with different variances. The parameter  $\tau_0$  was baseline  
63 log Bd load. The parameters  $\sigma \cdot$  were standard deviations of the random effects.

64 Finally, we accounted for qPCR measurement error of Bd load by modeling the observed load  $y_{ij}$  on  
65 swab  $j$  of host  $i$  as

$$\begin{aligned}
\log(y_{ij}) &\sim \text{Normal}(\log(x_i), \sigma_{\text{measurement}}) \text{ if } y_{ij} > 0 \\
\sigma_{\text{measurement}} &\sim \text{Half-Normal}(0, 1)
\end{aligned} \tag{S10}$$

66 The parameter  $\sigma_{\text{measurement}}$  was the standard deviation of the measurement error.

67 We fit the model using a Bayesian framework in the probabilistic programming language Stan. We fit  
68 four chains of 1000 samples with a warm-up of 500 samples using Hamiltonian Monte Carlo. We fit Bd survey  
69 data from each year separately. We used the estimated true loads  $\exp(\tau_{sp})$  and prevalences  $\zeta_{sp}$  directly with  
70 equation 2 in the main text to calculate relative and absolute species-level  $R_{0,s,p}$ . The Stan code for fitting  
71 the model is provided at <https://doi.org/10.25349/D9W59R>.

## 72 Estimating host density from amphibian surveys

73 We modeled the density of amphibian species  $s$  at pond  $p$  ( $N_{sp}^*$ ) using a multi-level model described in  
74 Joseph *et al.* (2016). We followed the notation of Joseph *et al.* (2016) for consistency and thus re-used some  
75 of the symbols defined in the previous section and elsewhere in manuscript. We re-define these symbols in  
76 this section as they are re-used. Let  $y_{psj}^*$  be the sampled host abundance from sweep  $j$  of host  $s$  in pond  $p$ .  
77 The model for host density is given by

$$y_{psj}^* \sim \begin{cases} \psi_{ps} \text{Poisson}(y_{psj}^* | \theta_{psj}) & \sum_{j=1}^{J_p} y_{psj}^* > 0 \\ \psi_{ps} \text{Poisson}(0 | \theta_{psj}) + 1 - \psi_{ps} & \text{otherwise} \end{cases} \tag{S11}$$

78 where  $J_p$  is the total number of sweeps in patch  $p$  and  $\psi_{ps}$  is the probability of true occupancy of host  
79 species  $s$  at site  $p$ . The model assumes that the probability of occupancy increases with host density  
80 following  $\log(\psi_{ps}) = \gamma_{0s} + \gamma_1 \log(\theta_{ps})$ . The parameter  $\gamma_{0s}$  is a host-specific intercept and  $\gamma_1$  determines the

81 relationship between log host density and occupancy probability.

82 The mean abundance  $\theta_{psj}$  of host  $s$  in patch  $p$  in sweep  $j$  depends on host-, site-, and sweep-specific  
 83 factors, where  $\alpha_{0s}$ ,  $\alpha_{ps}$ , and  $\alpha_{js}$  are random effects on host density for host  $s$ , in patch  $p$ , on sweep  $j$ . Given  
 84 a mean community abundance of  $\beta_c$ , we can write the log mean abundance as

$$\log(\theta_{psj}) = \beta_c + \alpha_{0s} + \alpha_{ps} + \alpha_{js} \quad (\text{S12})$$

85 where  $\alpha_{0s} \sim N(0, \sigma_{\text{host}})$ ,  $\boldsymbol{\alpha}_p \sim N_H(\mathbf{0}, \Sigma_{\text{patch}})$ , and  $\boldsymbol{\alpha}_j \sim N_H(\mathbf{0}, \Sigma_{\text{sweep}})$ , where  $N_d(\mathbf{0}, \Sigma)$  is a multivariate  
 86 normal distribution of dimension  $d$  with a mean vector of zero and a covariance matrix  $\Sigma$ . The random effect  
 87  $\boldsymbol{\alpha}_p$  is a vector of dimension  $H$  species sampled from a multivariate normal distribution and indicates that  
 88 the densities of host species may covary among patches according to  $\Sigma_{\text{patch}}$ . Similarly, the random effect  $\boldsymbol{\alpha}_j$   
 89 is vector of dimension  $H$  species sampled from a multivariate normal distribution and indicates that host  
 90 densities may covary among sweeps according to  $\Sigma_{\text{sweep}}$  (Joseph *et al.* 2016).

91 When fitting the model, we decomposed the covariance matrix  $\Sigma_*$  into  $\text{diag}(\boldsymbol{\sigma})\boldsymbol{\Omega}\text{diag}(\boldsymbol{\sigma})'$  where  $\text{diag}(\boldsymbol{\sigma})$   
 92 was a diagonal matrix of standard deviations and  $\boldsymbol{\Omega}$  was the correlation matrix. The prior distributions on  
 93 the parameters were (Joseph *et al.* 2016)

$$\begin{aligned} \beta_c &\sim N(0, 1) \\ \sigma_{\text{host}} &\sim \text{Half-Normal}(0, 1) \\ \boldsymbol{\Omega}_{\text{patch}}, \boldsymbol{\Omega}_{\text{sweep}} &\sim LKJ(2) \\ \log(\sigma_{ps}) &\sim N(\mu_{\text{patch}}, \sigma_\tau) \\ \log(\sigma_{js}) &\sim N(\mu_{\text{sweep}}, \sigma_\tau) \\ \mu_{\text{patch}} &\sim N(0, 1) \\ \mu_{\text{sweep}} &\sim N(0, 1) \\ \sigma_\tau &\sim \text{Half-Normal}(0, 1) \\ \gamma_{0s} &\sim N(\mu_{\text{occupancy}}, \sigma_{\text{occupancy}}) \\ \mu_{\text{occupancy}} &\sim N(0, 1) \\ \sigma_{\text{occupancy}} &\sim \text{Half-Normal}(0, 1) \\ \gamma_1 &\sim N(1, 1) \end{aligned} \quad (\text{S13})$$

94 The prior  $\log(\sigma_{ps}) \sim N(\mu_{\text{patch}}, \sigma_\tau)$  is describing the distribution of species-specific standard deviations in  
 95 patch  $p$ . These log standard deviations are drawn from a normal distribution with mean  $\mu_{\text{patch}}$  and a standard

96 deviation of  $\sigma_\tau$ . The prior distribution  $\log(\sigma_{js}) \sim N(\mu_{\text{sweep}}, \sigma_\tau)$  is similar, but is describing species-specific  
97 standard deviations within a sweep  $j$ . The other  $\sigma$  parameters all describe standard deviations of different  
98 random effects in the model.

99 We fit the model using a Bayesian framework in the probabilistic programming language Stan. We fit  
100 four chains of 1000 samples with a warm-up of 500 samples using Hamiltonian Monte Carlo. We fit host  
101 density data from each year separately (2013-2018). Stan code for fitting the model is provided by Joseph  
102 *et al.* (2016).

## 103 **Appendix S4: Including connectivity into multi-species, multi-patch** 104 **metacommunity models**

105 Given a set of connected patches, there were multiple connectivity parameter sets that were equally “plau-  
106 sible” given observed patterns of prevalence, Bd loads, and host density. By “plausible” we mean that  
107  $R_{0,s,p} \geq 0$  for all species and patches in the metapopulation. For example, assuming no dispersal always  
108 provides a plausible solution to equation S1. To address this challenge, we explored the plausible set of  
109 connectivity parameters to determine how the maintenance potential of a species and source potential of a  
110 patch varied over the plausible parameter space. Here, we described how we parameterized the connectivity  
111 portion of the multi-species, multi-patch model.

112 We defined species-specific connectivity parameters  $c_{s,jp}$ . The parameter  $c_{s,jp}$  defined the probability  
113 of a host species  $s$  moving from patch  $p$  to patch  $j$  conditional on dispersal. We defined the probability of  
114 moving from patch  $p$  to patch  $j$  as normalized exponential decay functions based on the Haversine distance  
115  $D_{jp}$  between patch  $p$  and  $j$   $\frac{a_s \exp(-a_s D_{jp})}{\sum_{m \in P, m \neq p} a_s \exp(-a_s D_{mp})}$  (Hanski 1999). We normalized the probabilities to one  
116 to ensure that an amphibian moved somewhere when it moved. We set the species-specific distance-decay  
117 parameter  $a_s$  to  $(0.5 \times \text{the maximum dispersal distance observed for a species in the literature})^{-1}$  to capture  
118 the relative propensity of different amphibian species to disperse different distances. The maximum dispersal  
119 distances we used were  $P. regilla = 2$  km (Smith & Green 2005),  $A. boreas = 6$  km (Smith & Green 2005),  
120  $R. catesbeiana = 1.6$  km (Smith & Green 2005),  $R. draytonii = 2.8$  km (Fellers & Kleeman 2007),  $T. torosa$   
121  $= 4$  km (Marsh & Trenham 2001), and  $T. granulosa = 1.6$  km (Pimentel 1960).

122 An important unknown connectivity parameter in the model was the ratio between species-specific dis-  
123 persal rate and the loss rate from the infected class,  $r_{sp} = \phi_s / b_{sp}$ . This parameter gives the expected number  
124 of patches to which an infected individual of species  $s$  that disperses from patch  $p$  moves to over its time  
125 infected. As this parameter could not be uniquely inferred from snapshot data, we instead allowed  $r_{sp}$  to

126 vary across all species and patches within a metapopulation and explored how species maintenance potential  
 127 and patch source potential changed across plausible values of  $r_{sp}$ , compared to an assumption of no dispersal  
 128 (i.e.  $r_{sp} = 0$ ).

129 While the minimum plausible value for  $r_{sp}$  was zero for all species and patches, the maximum value for  
 130  $r_{sp}$  varied by species and patch. We calculated the maximum  $r_{sp}$  value for species  $s$  in patch  $p$  by setting  
 131 equation S1 to zero and solving for  $r_{sp} = \frac{\phi_s}{b_{sp}}$ . Doing this, we obtained

$$r_{sp,\max} = \left( \sum_{j \in \text{Patches}} c_{pj} \frac{A_j}{A_p} \frac{\Pi_{sj}^*}{\Pi_{sp}^*} \frac{N_{sj}^*}{N_{sp}^*} - 1 \right)^{-1} \quad (\text{S14})$$

132 When  $\sum_{j \in \text{Patches}} c_{pj} \frac{A_j}{A_p} \frac{\Pi_{sj}^*}{\Pi_{sp}^*} \frac{N_{sj}^*}{N_{sp}^*} > 1$ ,  $r_{sp} > 0$  and there is a maximum plausible  $r_{sp}$ , above which  $R_{0,s,p} < 0$ .

133 When  $\sum_{j \in \text{Patches}} c_{pj} \frac{A_j}{A_p} \frac{\Pi_{sj}^*}{\Pi_{sp}^*} \frac{N_{sj}^*}{N_{sp}^*} \leq 1$  there is no maximum  $r_{sp}$ , such that  $r_{sp}$  can take any value between  
 134  $(0, \infty)$  and  $R_{0,s,p} > 0$ .

135 Biologically, equation S14 tells us something useful about how we would expect plausible  $r_{sp,\max}$  values  
 136 to vary with properties of a population within patch. Consider, without loss of generality, a single species  
 137 in a metapopulation with equally sized and equally connected patches (i.e.  $\frac{A_j}{A_p} = 1$  for all  $j$  and  $c_{pj} = c_{pi}$   
 138 for all  $i, j \neq p$ ). If we observed a patch with low prevalence and low host density relative to other patches  
 139 in the metapopulation at equilibrium (let's call it 'weak patch'), then the only way the observed prevalence  
 140 and density patterns could be possible would be if 1.) species dispersal ( $\phi_s$ ) was low or 2.) hosts lost  
 141 infection or died at a high rate within 'weak patch' ( $b_{sp}$  was high). Either of these scenarios would lead  
 142 to a low maximum plausible  $r_{sp}$  in 'weak patch'. In contrast, consider a patch with high prevalence and  
 143 high host density relative to other patches in the metapopulation (let's call it 'strong patch'). If 'strong  
 144 patch' had sufficiently higher density and prevalence than other patches on the landscape (specifically, such  
 145 that  $\sum_{j \in \text{Patches}} c_{pj} \frac{A_j}{A_p} \frac{\Pi_{sj}^*}{\Pi_{sp}^*} \frac{N_{sj}^*}{N_{sp}^*} \leq 1$ ), then 'strong patch' would be driving the pathogen dynamics on the  
 146 landscape. In other words, 'strong patch's contributions to density and prevalence in other patches would be  
 147 much more than other patches contributions to density and prevalence within 'strong patch'. Therefore, it  
 148 does not matter how large  $r_{sp}$  is for 'strong patch', because there is no expectation that observed prevalence  
 149 or density in 'strong patch' needs to conform to other patches on the landscape when patches are tightly  
 150 connected (i.e.  $r_{sp}$  is high).

151 We applied equation S14 to all species in all patches in all metacommunities (1135 species by patch by  
 152 metacommunity combinations, e.g. *A. boreas* in patch 1 in metacommunity 2) and found that 37% of species  
 153 by patch by metacommunity combinations were 'strong patches' with no empirical constraint on  $r_{sp}$  (i.e.  
 154  $r_{sp} \in (0, \infty)$  for 37% of the patches). The other 63% of species by patch combinations were 'weak patches'

155 where maximum  $r_{sp}$  was constrained. For 89% of the ‘weak patches’, constrained maximum  $r_{sp}$  values were  
 156 predicted to be less than one. This amounted to 56% of the 1135 species by patch by metacommunity  $r_{sp}$   
 157 values being restricted to less than one.

158 Using this information, for each metacommunity with  $H$  species and  $P$  patches we drew  $H \times P$   $r_{sp}$   
 159 parameters uniformly between zero and  $\min(r_{sp,\max}, 1)$  and computed the species-level  $R_{0,s,p}$  for all species  
 160 and patches in a metacommunity using equation S1. We assumed that plausible values of  $r_{sp}$  would not be  
 161 greater than one for three reasons. First, the above analysis showed that over half of  $r_{sp,\max}$  values were  
 162 constrained to be less than one strictly based on the observed data. Second, larvae and metamorphs were  
 163 the most abundant life stages present in a pond during sampling and these life stages disperse little if at all  
 164 before maturing into juveniles and adults. Therefore, we would expect within-season dispersal rate to be  
 165 low. Third, 90% of the observed Bd loads were less than 500 zoospores and previous studies have shown  
 166 that even susceptible species can clear infections when loads are less than or equal to 500 zoospores (e.g.  
 167 Wilber *et al.* 2016; Ohmer *et al.* 2017). This suggests that Bd loss rates are likely high relative to dispersal  
 168 rates such that  $r_{sp}$  is less than one. As a sensitivity analysis, we also explored allowing  $r_{sp}$  to vary uniformly  
 169 between 0 and  $\min(r_{sp,\max}, 10)$  and our general results were unchanged.

## 170 **Appendix S5: Computing landscape-level $R_{0,L}$**

171 The landscape-level  $R_{0,L}$  for equation 1 in the main text defines the average number of infected hosts  
 172 produced by an average infected host in a fully susceptible metacommunity. Using the next-generation  
 173 matrix approach (Diekmann *et al.* 1990),  $R_{0,L}$  can be calculated as

$$R_{0,L} = \max \text{eig}(\mathbf{R}(-\mathbf{B})^{-1}) \quad (\text{S15})$$

174 where

$$\mathbf{R} = \begin{bmatrix} R_1 & 0 & \cdots & 0 \\ 0 & R_2 & \cdots & 0 \\ \vdots & \vdots & \vdots & \vdots \\ 0 & 0 & \cdots & R_P \end{bmatrix} \quad (\text{S16})$$

175 The variable  $P$  gives the number of patches in a metacommunity and  $H$  gives the total number of host  
 176 species. The sub-matrix  $R_j$  is given by



$$R_j = \begin{bmatrix} R_{0,1,j} \frac{\lambda_{1j}}{\lambda_{1j}} b_{1j} & R_{0,1,j} \frac{\lambda_{2j}}{\lambda_{1j}} b_{1j} & \cdots & R_{0,1,j} \frac{\lambda_{Hj}}{\lambda_{1j}} b_{1j} \\ \vdots & \vdots & \vdots & \vdots \\ R_{0,H,j} \frac{\lambda_{1j}}{\lambda_{Hj}} b_{Hj} & R_{0,H,j} \frac{\lambda_{2j}}{\lambda_{Hj}} b_{Hj} & \cdots & R_{0,H,j} \frac{\lambda_{Hj}}{\lambda_{Hj}} b_{Hj} \end{bmatrix} \quad (\text{S17})$$

177  $R_{0,i,j}$  is the species-level  $R_0$  for species  $i$  in patch  $j$ .

178 The matrix  $\mathbf{B}$  defines how infected hosts in the metacommunity transition while in the infected class.  
 179 This could mean leaving the infected class or moving to another patch.  $\mathbf{B}$  can be defined by the square  
 180 sub-matrices

$$\mathbf{B} = \begin{bmatrix} D_1 & E_{12} & \cdots & E_{1P} \\ E_{21} & D_2 & \cdots & E_{2P} \\ \vdots & \vdots & \vdots & \vdots \\ E_{P1} & E_{P2} & \cdots & D_P \end{bmatrix} \quad (\text{S18})$$

181  $D_p$  for patch  $p$  is a diagonal  $H \times H$  matrix

$$D_p = \begin{bmatrix} -b_{1p} - \phi_1 \sum_{i=1}^P c_{i,p} & 0 & \cdots & 0 \\ 0 & -b_{2p} - \phi_2 \sum_{i=1}^P c_{i,p} & \cdots & 0 \\ \vdots & \vdots & \vdots & \vdots \\ 0 & 0 & \cdots & -b_{Hp} - \phi_H \sum_{i=1}^P c_{i,p} \end{bmatrix} \quad (\text{S19})$$

182 where  $\sum_{i=1}^P c_{i,p} = 1$  given that  $c_{i,p}$  defines the probability of moving from patch  $p$  to  $i$ , conditional on a  
 183 host moving somewhere (see equation 1 in the main text).  $b_{1p}$  is the rate that infected individuals of species  
 184 1 in patch  $j$  leave the infected class. This could be due to recovery, natural mortality, or disease-induced  
 185 mortality.

186  $E_{ip}$  is the diagonal  $H \times H$  matrix

$$E_{ip} = \begin{bmatrix} \frac{A_p}{A_i} c_{ip} \phi_1 & 0 & \cdots & 0 \\ 0 & \frac{A_p}{A_i} c_{ip} \phi_2 & \cdots & 0 \\ \vdots & \vdots & \vdots & \vdots \\ 0 & 0 & \cdots & \frac{A_p}{A_i} c_{ip} \phi_H \end{bmatrix} \quad (\text{S20})$$

187 where  $\frac{A_p}{A_i}$  is the ratio of patch areas for patch  $p$  and  $i$  and  $\phi_s$  is the dispersal rate of species  $s$ . Note that  
 188 parameters  $c_{ip}$  could be made species-specific by writing  $c_{s,ip}$ .

189 Inspection of the matrix  $\mathbf{K} = \mathbf{R}(-\mathbf{B})^{-1}$ , shows that all entries in  $K$  can be re-written in terms of ratios

190  $\phi_s/b_{sp} = r_{sp}$  and  $b_{sp}/b_{tq}$  for  $s, t = 1, \dots, H$  and  $p, q = 1, \dots, P$ . Therefore, the only additional information  
 191 needed to compute landscape-level  $R_{0,L}$  after having computed  $R_{0,s,p}$  using equation S1 are the ratios of  
 192 loss of infected rates  $b_{sp}/b_{tq}$ .

### 193 Assumptions regarding $b_{sp}/b_{tq}$ ratios

194 Calculating landscape-level  $R_{0,L}$  for an amphibian metacommunity required the ratios between the rates at  
 195 which hosts left the infected class (i.e.  $b_{ij}/b_{sp}$  for  $i, s = 1, \dots, S$ ,  $j, p = 1, \dots, P$ ). We made the following two  
 196 assumptions about the relative values of the rate of loss from the infected class  $b_{sp}$ . First, we assumed that  
 197 recovery rates from Bd infection were inversely related to load, such that individuals with higher loads had  
 198 a lower probability of clearing infection (Wilber *et al.* 2016; Ohmer *et al.* 2017). Second, we assumed loss of  
 199 infection  $\nu_{sp}$  occurred at a faster rate than background host mortality  $d_{sp}$  such that we could approximate  
 200  $b_{ij}/b_{sp}$  as a ratio of estimated mean Bd loads for species  $s$  in patch  $p$   $\mu_{sp}$ :  $\frac{b_{ij}}{b_{sp}} = \frac{1/\mu_{ij}}{1/\mu_{sp}} = \frac{\mu_{sp}}{\mu_{ij}}$ .

201 However, this assumption ignores the reality that the background death rate of amphibian larvae may  
 202 be non-negligible (e.g. Vonesh & De la Cruz 2002). Consider  $b_{sp} = d_{sp} + \nu_{sp}$  where  $d_{sp}$  is the background  
 203 mortality rate and  $\nu_{sp}$  is the recovery rate of larvae from species  $s$  in patch  $p$ . Our previous assumption was  
 204 specifically that  $d_{sp}$  was small relative to the recovery rate  $\nu_{sp}$ , which may not be true.

205 Now consider the ratio of two rates of removal from the infected class  $\frac{b_1}{b_2} = \frac{d_1 + \nu_1}{d_2 + \nu_2}$ . Note that we can  
 206 re-write this equation as  $\frac{b_1}{b_2} = \frac{\delta_1 + 1}{\frac{d_2}{d_1} \delta_1 + \frac{\nu_2}{\nu_1}}$  where  $\delta_1 = \frac{d_1}{\nu_1}$ . This form of the ratio shows that, given some  
 207 knowledge of the relative death rates  $d_2/d_1$  and relative recovery rates  $\nu_2/\nu_1$ , the only information needed  
 208 is the size of  $\delta_1$ . For the results given in the main text, we assumed that  $\delta_1 \rightarrow 0$  such that  $\frac{b_1}{b_2} = \frac{\nu_1}{\nu_2}$ . Here,  
 209 we examined  $\delta_1 = 1$  (i.e. death rate and recovery rate are on the same scale) and  $\delta_1 = 10$  (i.e. death rate is  
 210 larger than recovery rate) to see if our conclusions on the importance of maintenance species compared to  
 211 source patches are robust to our assumption about background mortality rate.

212 To roughly approximate relative death rates of amphibian larvae, we used pace-of-life theory to hypoth-  
 213 esize that amphibian larvae death rate for a species was proportional to reproductive output (Dammhahn  
 214 *et al.* 2018). Specifically, we assumed that larvae of species that laid more eggs on average had a higher mor-  
 215 tality rate. While approximate, this assumption allowed us to estimate relative death rates using published  
 216 values on the number of eggs laid by amphibians per breeding season. The average number of eggs for each  
 217 amphibian species was 5200 eggs for *A. boreas* (1 clutch), 2000 eggs for *R. draytonii* (1 clutch), 7000 eggs  
 218 for *R. catesbeiana* (1 clutch), 200 eggs for *T. torosa* (over 4 clutches), 200 eggs for *T. granulosa* (unknown  
 219 number of clutches), and 575 eggs for *P. regilla* (1 clutch, though can have up to 3 clutches) (values from  
 220 University of California, Berkeley, USA 2019; Stebbins & McGinnis 2012).

221 We calculated the plausible connectivity parameter space for each metacommunity with the constraints  
222 that  $\delta_1 = 0, 1,$  and  $10,$  ratios of larvae death rates between host species were approximated by ratios of clutch  
223 sizes, ratios of loss of infection rates were approximated by  $1 /$  estimated Bd loads, and  $r_{sp} = \phi_s/b_{sp} < 1.$   
224 For each metacommunity, we drew 10,000 parameter sets where each parameter set was a  $P \times H$  matrix of  
225  $r_{sp}$  values satisfying the above constraints. We computed  $R_{0,s,p}$  for each parameter set.

226 Once armed with 10,000 plausible parameter sets, we then, for each metacommunity, drew a plausible  
227 parameter set, computed landscape-level  $R_{0,L}$  for each parameter set based on  $\delta_1$  and relative  $b_{sp}$  and  $\phi_s$   
228 values. We then separately removed either the most influential source patch or a particular species in the  
229 metacommunity and recomputed landscape-level  $R_{0,L}$ . For example, for a metacommunity with four species  
230 we computed six  $R_{0,L}$  values for a given plausible parameter set: one baseline  $R_{0,L}$ , a removed  $R_{0,L}$  for  
231 each of the four species, and a removed  $R_{0,L}$  for the most influential source patch. The details on how we  
232 removed a species/patch are given below. We repeated this 100 times, randomly sampling from the plausible  
233 parameter space, and took the mean landscape-level  $R_{0,L}$  values from these 100 simulations.

234 In summary, our results regarding the impact of species removals compared to source patch removals  
235 were not sensitive to our choice of background larvae mortality rates (Fig. S3, S4). In the main text, we  
236 present the results with  $\delta_1 = 0,$  which corresponds to a large loss of infection rate relative to background  
237 mortality rate.

## 238 **Removing species and patches and re-computing $R_{0,L}$**

239 To remove a species from a metacommunity, we can simply remove all of the rows and columns in  $\mathbf{R}$  and  
240  $\mathbf{B}$  that are associated with the species of interest to obtain  $\mathbf{R}_{\text{sdel}}$  and  $\mathbf{B}_{\text{sdel}}.$   $\mathbf{K}_{\text{sdel}}$  can then be calculated  
241 as above. For example, consider a metacommunity with  $S = 3$  species and  $P = 2$  patches. If we wanted to  
242 remove species 1, we would delete rows 1, 4 and columns 1, 4 in  $\mathbf{R}$  and  $\mathbf{B}.$

243 Removing a patch requires re-calculating  $\mathbf{B}$  because the connectivity matrix  $\mathbf{C}$  changes when a patch is  
244 deleted. The entry  $c_{ij}$  in  $\mathbf{C}$  defines the probability of moving from patch  $j \rightarrow i$  given a host moves somewhere,  
245 such that the sum of each column in  $\mathbf{C}$  is one. Deleting patch  $p$  first requires setting all probabilities  $c_{pj}$  and  
246  $c_{ip}$  in  $\mathbf{C}$  to zero and re-normalizing the columns such that they sum to one. Note that the updated  $\mathbf{C}'$  is  
247 still a  $P \times P$  matrix. The matrix  $\mathbf{B}'$  can then be calculated with the updated  $\mathbf{C}'.$  To complete the removal  
248 of patch  $p,$  we can remove rows and columns  $(p - 1)S + 1, \dots, (p - 1)S + S$  from  $\mathbf{B}'$  and  $\mathbf{R}$  to obtain  $\mathbf{R}_{\text{pdel}}$   
249 and  $\mathbf{B}_{\text{pdel}}.$   $\mathbf{K}_{\text{pdel}}$  can then be calculated as above.

## References

- 250
- 251 Dammhahn, M., Dingemanse, N. J., Niemelä, P. T. & Réale, D. (2018). Pace-of-life syndromes: a framework  
252 for the adaptive integration of behaviour, physiology and life history. *Behav Ecol Sociobiol*, 72, 62.
- 253 Diekmann, O., Heesterbeek, J. A. P. & Metz, J. A. J. (1990). On the definition and the computation of the  
254 basic reproduction ratio  $R_0$  in models for infectious diseases in heterogeneous populations. *J Math Biol*,  
255 28, 365–382.
- 256 DiRenzo, G. V., Campbell Grant, E. H., Longo, A. V., Che-Castaldo, C., Zamudio, K. R. & Lips, K. R.  
257 (2018). Imperfect pathogen detection from non-invasive skin swabs biases disease inference. *Methods Ecol*  
258 *Evol*, 9, 380–389.
- 259 DiRenzo, G. V., Langhammer, P. F., Zamudio, K. R. & Lips, K. R. (2014). Fungal infection intensity and  
260 zoospore output of *Atelopus zeteki*, a potential acute chytrid supershedder. *PLoS ONE*, 9, 1–6.
- 261 Fellers, G. M. & Kleeman, P. M. (2007). California red-legged frog (*Rana draytonii*) movement and habitat  
262 uses: implications for conservation. *J Herpetol*, 41, 276–286.
- 263 Fenton, A., Streicker, D. G., Petchey, O. L. & Pedersen, A. B. (2015). Are all hosts created equal? Partition-  
264 ing host species contributions to parasite persistence in multihost communities. *Am Nat*, 186, 610–622.
- 265 Hanski, I. (1999). *Metapopulation Ecology*. Oxford University Press, Oxford.
- 266 Joseph, M. B., Stutz, W. E. & Johnson, P. T. (2016). Multilevel models for the distribution of hosts and  
267 symbionts. *PLoS ONE*, 11, 1–15.
- 268 Marsh, D. M. & Trenham, P. C. (2001). Metapopulation dynamics and amphibian conservation. *Conserv*  
269 *Biol*, 15, 40–49.
- 270 Miller, D. A. W., Talley, B. L., Lips, K. R. & Campbell Grant, E. H. (2012). Estimating patterns and drivers  
271 of infection prevalence and intensity when detection is imperfect and sampling error occurs. *Methods Ecol*  
272 *Evol*, 3, 850–859.
- 273 Ohmer, M. E., Cramp, R. L., Russo, C. J., White, C. R. & Franklin, C. E. (2017). Skin sloughing in  
274 susceptible and resistant amphibians regulates infection with a fungal pathogen. *Sci Rep-UK*, 7, 3529.
- 275 Pimentel, R. A. (1960). Inter- and intrahabitat movements of the rough-skinned newt, *Taricha torosa*  
276 *granulosa* (Skilton). *Am Mdl Nat*, 63, 470–496.

277 Smith, M. A. & Green, D. M. (2005). Dispersal and the metapopulation paradigm in amphibian ecology  
278 and conservation: are all amphibian populations metapopulations? *Ecography*, 28, 110–128.

279 Stebbins, R. C. & McGinnis, S. M. (2012). *Field Guide to Amphibians and Reptiles of California: Revised*  
280 *Edition*. University of California Press, Berkeley, CA.

281 University of California, Berkeley, USA (2019). AmphibiaWeb. URL <https://amphibiaweb.org>.

282 Vonesh, J. R. & De la Cruz, O. (2002). Complex life cycles and density dependence: Assessing the contri-  
283 bution of egg mortality to amphibian declines. *Oecologia*, 133, 325–333.

284 Wilber, M. Q., Langwig, K. E., Kilpatrick, A. M., McCallum, H. I. & Briggs, C. J. (2016). Integral Projection  
285 Models for host-parasite systems with an application to amphibian chytrid fungus. *Methods Ecol Evol*, 7,  
286 1182–1194.

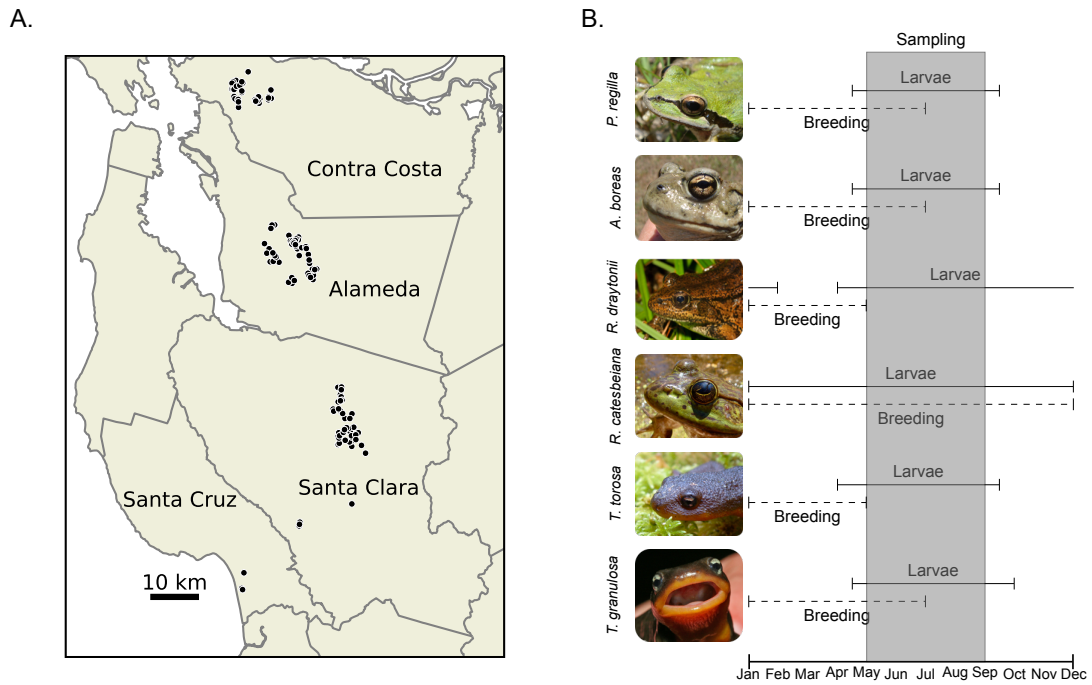

Figure S1: **A.** The unique ponds (patches) sampled in Contra Costa, Alameda, Santa Clara, and Santa Cruz counties in California, USA. There were also two ponds sampled in Monterey County (not shown). Black points are sampled ponds. White is water and brown is land **B.** The approximate timing of amphibian breeding and presence of larvae in ponds for the six amphibian species considered in this study. The gray region is the time of year when ponds were sampled for larval amphibian density and Bd prevalence.

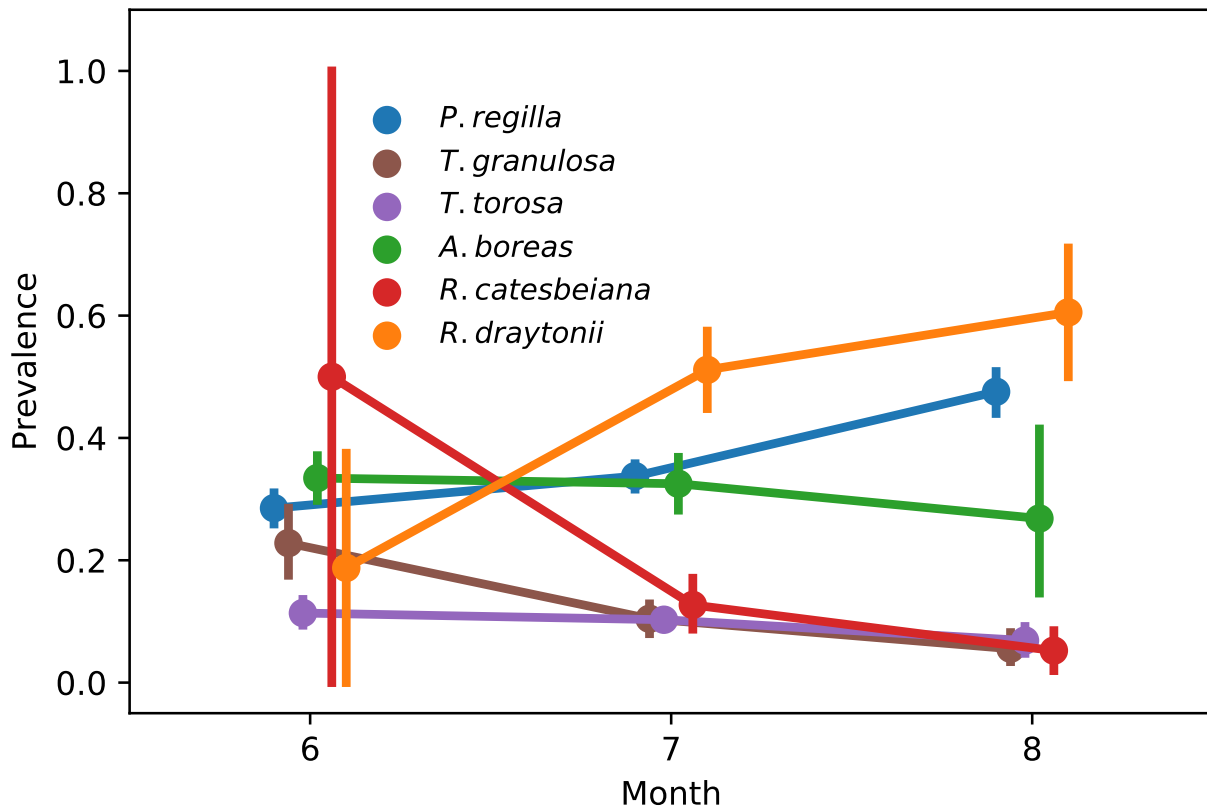

Figure S2: Plot of landscape-level prevalence in six amphibian species over the three months with the largest sampling effort from 2013-2018. Each point represents the mean prevalence of the amphibians sampled in that month. Sites were not sampled every month, so only a fraction of sites are represented in different points. Therefore, directly comparing across points is challenging. However, under an equilibrium assumption, we would expect relatively constant prevalences over the three months. In general, we do not see strong deviations from this expectation. While limited, this plot provides some evidence that there are not severe deviations from an endemic assumption at the landscape-level.

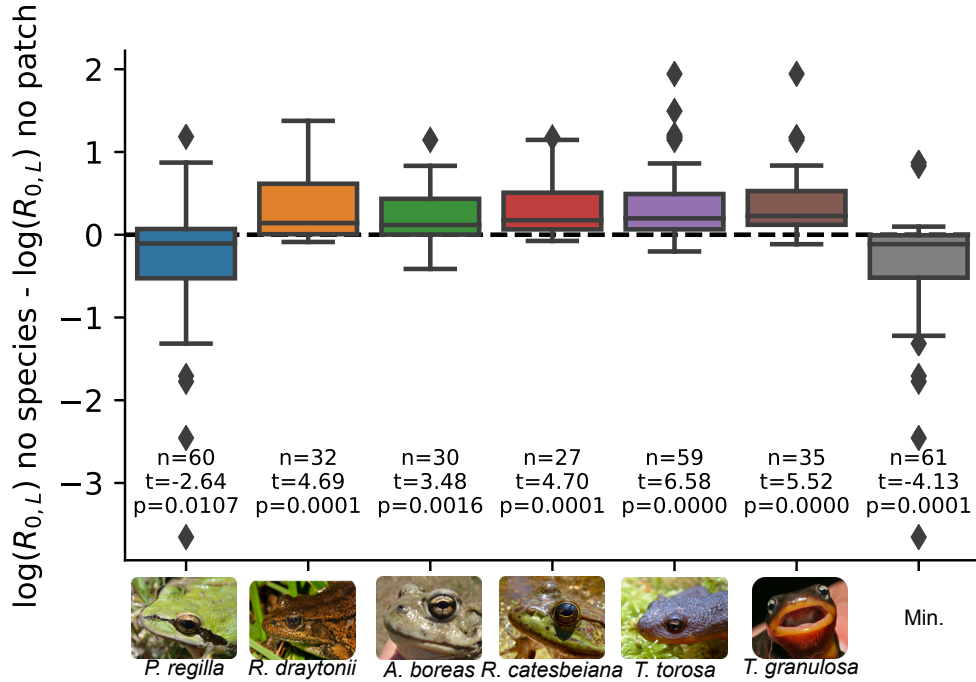

Figure S3: The effect of removing a species on landscape-level  $R_{0,L}$  compared to removing the most influential source patch for 61 metacommunities with at least two patches and two species. Similar to Figure 5 in the main text, but the ratio between background mortality rate and loss of infection rate is set to one ( $\delta_1 = 1$ ). Negative values indicate a larger reduction in landscape-level  $R_{0,L}$  when a species is removed compared to when the most influential source patch is removed from the metacommunity. The sample sizes give the number of metacommunities out of 61 where a species was present. The  $t$ -statistics are from single sample  $t$ -tests testing the null hypothesis that the ratio  $\log\left(\frac{R_{0,L} \text{ no species}}{R_{0,L} \text{ no patch}}\right)$  is significantly different than zero. The  $p$  value is the significance value of the single sample  $t$ -test. The gray boxplot Min. shows the minimum ratio  $\log\left(\frac{R_{0,L} \text{ no species}}{R_{0,L} \text{ no patch}}\right)$  across all species within a given metacommunity. The dashed line indicates where removing a species and removing the most influential source patch have the same effect on landscape-level  $R_{0,L}$ .



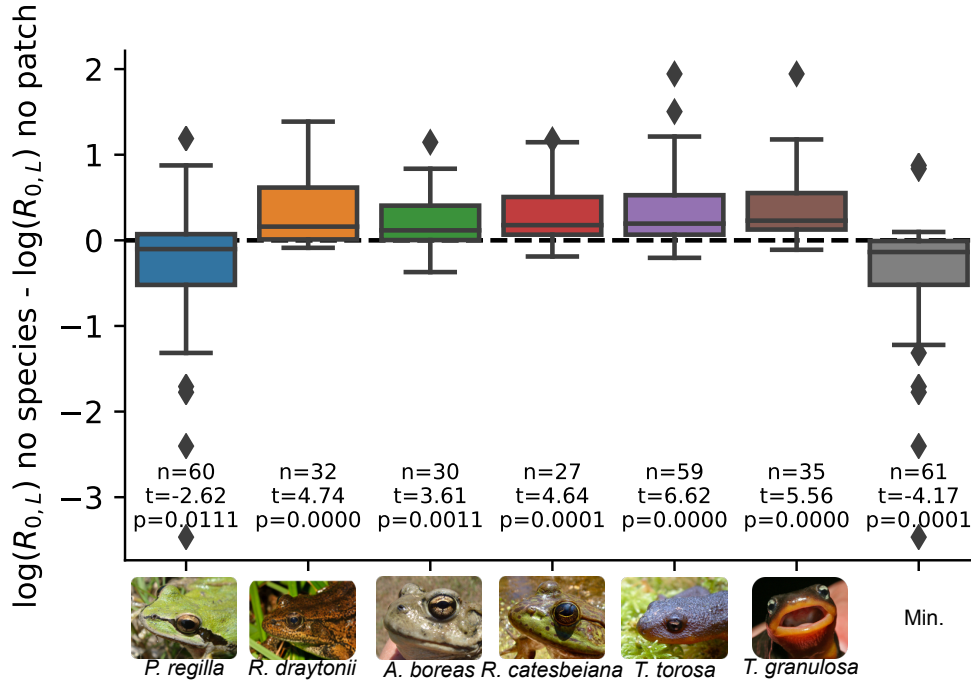

Figure S4: The effect of removing a species on landscape-level  $R_{0,L}$  compared to removing the most influential source patch for 61 metacommunities with at least two patches and two species. Similar to Figure 5 in the main text, but the ratio between background mortality rate and loss of infection rate is set to 10 ( $\delta_1 = 10$ ). Negative values indicate a larger reduction in landscape-level  $R_{0,L}$  when a species is removed compared to when the most influential source patch is removed from the metacommunity. The sample sizes give the number of metacommunities out of 61 where a species was present. The  $t$ -statistics are from single sample  $t$ -tests testing the null hypothesis that the ratio  $\log\left(\frac{R_{0,L \text{ no species}}}{R_{0,L \text{ no patch}}}\right)$  is significantly different than zero. The  $p$  value is the significance value of the single sample  $t$ -test. The gray boxplot Min. shows the minimum ratio  $\log\left(\frac{R_{0,L \text{ no species}}}{R_{0,L \text{ no patch}}}\right)$  across all species within a given metacommunity. The dashed line indicates where removing a species and removing the most influential source patch have the same effect on landscape-level  $R_{0,L}$ .
